# Supplementary material
Source: PubMed Central journal article supplement (PMC3010281)
Supplement: NIHMS256863-supplement-01.pdf [file NIHMS256863-supplement-01.pdf]

**Supporting Information**  
**Table of contents**

- I.** Experimental details of synthesis and characterization of the products
- II.** Table S1. The reaction condition, conversion and Mass <sup>1</sup>HNMR data
- III.** Figure S1. The UV absorption spectra of compound **9**
- IV.** Figure S2. Absorption and fluorescence of compound **11d**.
- V.** References

## Organic synthetic experiment

### 2-iodobenzo[d]thiazole (**7**)<sup>1</sup>

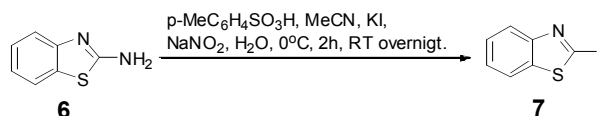

To a solution of 2-aminobenzo[d]thiazole (**6**) (3.75g, 25mol) and p-TsOH (15g, 75mmol) in acetonitrile (100ml) was added a mixture solution of KI (10.5g, 65mmol) and NaNO<sub>2</sub> (3.5g, 50mol) in water (15ml) at 0°C. The reaction solution was stirred at 0°C for 2h, and then at RT overnight. To the reaction solution was added around 350ml of water, adjust the solution pH to 8-9 with NaHCO<sub>3</sub> and added Na<sub>2</sub>S<sub>2</sub>O<sub>3</sub>, filtered and the solid was washed to give brown solid 5.52g (yield 84.7%). TLC: Rf: 0.6 (hexane/ethyl acetate=6/1). MS (ESI) m/z 262 (M<sup>+</sup>+H); <sup>1</sup>HNMR (CDCl<sub>3</sub>, 300MHz) δ 8.06 (1H, dd, J<sub>1</sub>=7.5Hz, J<sub>2</sub>=1.8Hz), 7.87 (1H, dd, J<sub>1</sub>=6.9Hz, J<sub>2</sub>=1.5Hz), 7.50~7.38 (2H, m).

### 2-ethynylbenzo[d]thiazole (**9**)<sup>2</sup>

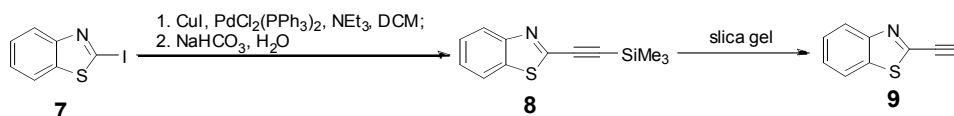

To a mixture solution of **7** (0.87g, 3.33mmol), and trimethylsilylazide **10a** (0.65g, 6.66mmol) in triethylamine (3.3ml) and DCM (7ml) was added Pd(PPh)<sub>2</sub>Cl<sub>2</sub> (47mg) and CuI (14mg), and stirred at 65°C for 4h. The reaction solution was diluted with EtOAc, and filtered. The filtrate was concentrated and purified by silica gel column to give 120 mg of solid **9** (yield 22.6%). Rf: 0.45 (hexane/ethyl acetate=6/1). MS (ESI) m/z 160(M<sup>+</sup>+H), <sup>1</sup>HNMR (CDCl<sub>3</sub>, 300MHz) δ 8.11 (1H, d, J=7.8Hz), 7.89 (1H, dd, J<sub>1</sub>=7.8Hz, J<sub>2</sub>=1.5Hz), 7.59~7.40 (2H, m), 3.61(1H, s).

### Method A: Click reaction (11a)<sup>3</sup>

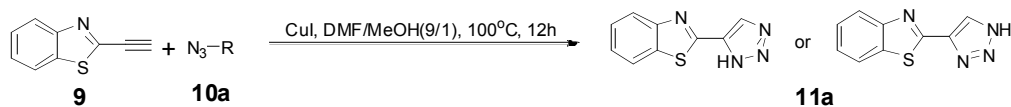

To a solution of Benzothiazole alkyne (**9**) (80mg, 0.5mmol) and trimethylsilyl azide (0.1ml, 0.75mmol) in DMF/MeOH (9/1, 1ml) was added CuI (4.8mg, 0.025mmol). The reaction solution was stirred at 100°C for 12h. Around 20% starting material **9** was converted to product, checked by TLC. Part of the reaction solution was purified by preparative TLC to give 6 mg of white solid **11a**.

The MS and <sup>1</sup>HNMR data were summary in table S1.

### Method B: Click reaction (11b-d)<sup>4</sup>

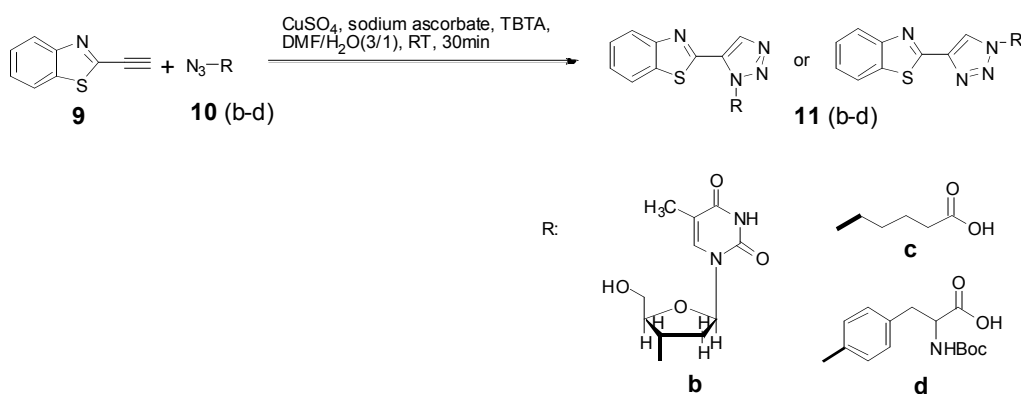

To a solution of AZT (**10b**) (28mg, 0.105mmol) in DMF (6ml) and H<sub>2</sub>O (2ml) was added Benzothiazole alkyne (**9**) (16.7mg, 0.105mmol), CuSO<sub>4</sub> (3.3mgmg), sodium ascorbate (5mg), and TBTA (8mg), stirred 30min at RT, followed by TLC and HPLC. Starting material **9** was disappeared completely (100% conversion). Only the desired product peaks were found in HPLC. The reaction solution was extracted with EtOAc and washed with brine, dried over Na<sub>2</sub>SO<sub>4</sub>.

After removing solvent under reduced pressure, the residue was purified by silica gel column, eluted with 5% MeOH in EtOAc to give 40mg white solid **11b**, yield 89.4%.

Same procedure was used to prepare **11c** and **11d**.

**Method C: 2-(1H-1,2,3-triazol-1-yl)benzo[d]thiazole<sup>5</sup>**

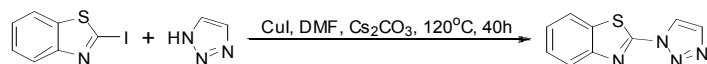

To a solution of 2-iodobenzo[d]thiazole (130mg, 0.5mmol) and 1,2,3-triazole (35mg, 0.75mmol) in DMF (2ml) was added Cs<sub>2</sub>CO<sub>3</sub> (0.33g, 1mmol) and CuI (19mg, 0.1mmol) at RT and then stirred at 120°C for 40h. The reaction solution was extracted with ethyl acetate, washed with brine, dried over Na<sub>2</sub>SO<sub>4</sub> and concentrated. The residue was purified by silica gel column to give white solid (43mg, yield 42.6%). TLC Rf: 0.32 (Hexane/EtOAc=3/1). MS and <sup>1</sup>HNMR data see in table S1.

**Table S1.** The reaction condition, conversion and Mass <sup>1</sup>HNMR data

|            | R                                                                                   | method <sup>a</sup> | conversion <sup>b</sup> | MS                      | <sup>1</sup> HNMR                                                                                                                                                                                                                                             |
|------------|-------------------------------------------------------------------------------------|---------------------|-------------------------|-------------------------|---------------------------------------------------------------------------------------------------------------------------------------------------------------------------------------------------------------------------------------------------------------|
| <b>11a</b> | H                                                                                   | A                   | ~20%                    | 203(M <sup>+</sup> +H)  | CDCl <sub>3</sub> : 12.11 (1H, br), 8.43 (1H, s), 8.12 (1H, d, J=7.8Hz), 7.97 (1H, d, J=8.1Hz), 7.60-7.52 (1H, m), 7.50-7.40 (1H, m)                                                                                                                          |
| <b>11b</b> | 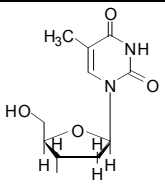   | B                   | 100%                    | 427 (M <sup>+</sup> +H) | MeOD: 8.79 (1H,s), 8.10-8.00 (2H, m), 7.95 (1H, d, J=1.2Hz), 7.60-7.40 (2H, m), 6.57 (1H, t, J=6.6Hz), 5.61-5.57 (1H, m), 4.52-4.48 (1H, m), 3.97 (1H, dd, J1=12.3Hz, J2=3.0Hz), 3.85 (1H, dd, J1=12.3Hz, J2=3.0Hz), 3.10-2.78 (3H, m), 1.94 (3H, d, J=1.2Hz) |
| <b>11c</b> |    | B                   | 100%                    | 303 (M <sup>+</sup> +H) | MeOD: 8.67 (1H,s), 8.07-8.00 (2H, m), 7.6-7.40 (2H, m), 4.57 (2H, t, J=7.2Hz), 2.25 (2H, t, J=7.5Hz), 2.10-1.99 (2H, m), 1.74-1.60 (2H, m)                                                                                                                    |
| <b>11d</b> |  | B                   | 100%                    | 446 (M <sup>+</sup> +H) | MeOD: 9.13(1H, s), 8.09-8.03 (2H, m), 7.84 (2H, d, J=8.4Hz), 7.60-7.40 (4H, m), 4.30-4.20 (1H, m), 3.30-3.25 (1H, d, J=4.8Hz), 3.09-3.01 (1H, m), 1.41 (9H, s).                                                                                               |
| <b>16</b>  |  | C                   | ~50%                    | 203(M <sup>+</sup> +H)  | CDCl <sub>3</sub> : 8.12-8.08 (1H, m), 7.99 (2H, s), 7.90 (1H, m), 7.60-7.52 (1H, m), 7.48-7.42 (1H, m)                                                                                                                                                       |

<sup>a</sup>Reaction conditions: A: CuSO<sub>4</sub>, sodium ascorbate, DMF/H<sub>2</sub>O (3/1), RT, overnight. B: CuSO<sub>4</sub>, sodium ascorbate, TBTA, DMF/H<sub>2</sub>O (3/1), RT, 30min. <sup>b</sup>Conversion was estimated by TLC.

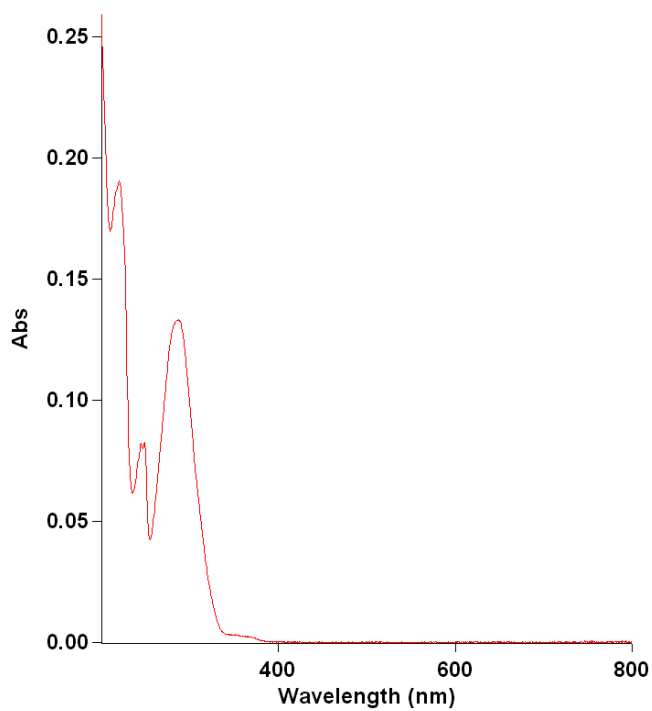

**Figure S1.** The UV absorption spectra of compound **9** in H<sub>2</sub>O (10 μM),  $\lambda_{\max(\text{abs})}$ : 286nm.

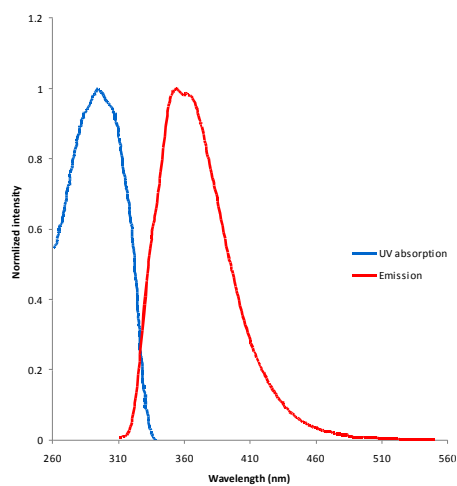

**Figure S2.** Absorption (blue line,  $\lambda_{\max(\text{abs})}$ =294nm) and fluorescence (red line  $\lambda_{\max(\text{em})}$ =354nm) of compound **11d** in MeOH

## Reference

- (1) Krasnokutskaya, E. A.; Semenischeva, N. I.; Filimonov, V. D.; Knochel, P. *Synthesis* **2007**, 81-84.
- (2) Van den Hoven, B. G.; Alper, H. *J. Am. Chem. Soc.* **2001**, *123*, 1017-1022.
- (3) Jin, T.; Kamijo, S.; Yamamoto, Y. *Eur. J. Org. Chem.* **2004**, 3789-3791.
- (4) Chan, T. R.; Hilgraf, R.; Sharpless, K. B.; Fokin, V. V. *Org. Lett.* **2004**, *6*, 2853-2855.
- (5) Zhu, L. B.; Guo, P.; Li, G. C.; Lan, J. B.; Xie, R. G.; You, J. S. *J. Org. Chem.* **2007**, *72*, 8535-8538.
